# Supplementary material
Source: PubMed Central journal article supplement (PMC8639726)
Supplement: NIHMS1741809-supplement-1.pdf [file NIHMS1741809-supplement-1.pdf]

**Supplemental Table 1. Detailed Adverse Events**

|                                                                | Unrelated |       |       | Related |       |       |
|----------------------------------------------------------------|-----------|-------|-------|---------|-------|-------|
|                                                                | Gr. 1     | Gr. 2 | Gr. 4 | Gr. 1   | Gr. 2 | Gr. 3 |
| <b>Investigations</b>                                          |           |       |       |         |       |       |
| Lymphocyte count decreased                                     | 1         | 1     |       | 5       | 3     | 1     |
| White blood cell decreased                                     |           |       |       | 5       |       |       |
| Investigations - Other - INR decrease                          | 1         |       |       |         |       |       |
| Platelet count decreased                                       | 2         |       | 1     | 5       |       |       |
| Investigations - Other - TSH low                               |           |       |       | 2       |       |       |
| Neutrophil count decreased                                     |           |       |       | 1       |       |       |
| Alanine aminotransferase increased                             |           |       |       |         | 1     |       |
| Blood bilirubin increased                                      | 1         |       |       |         |       |       |
| <b>Respiratory, thoracic and mediastinal disorders</b>         |           |       |       |         |       |       |
| Cough                                                          |           |       |       | 1       |       |       |
| Allergic rhinitis                                              |           |       |       | 2       |       |       |
| Dyspnea                                                        |           |       |       | 1       |       |       |
| Postnasal drip                                                 | 1         |       |       | 1       |       |       |
| <b>Blood and lymphatic system disorders</b>                    |           |       |       |         |       |       |
| Anemia                                                         | 1         | 1     |       | 6       | 1     |       |
| <b>Musculoskeletal and connective tissue disorders</b>         |           |       |       |         |       |       |
| Arthralgia                                                     |           |       |       | 8       |       |       |
| Myalgia                                                        |           | 1     |       | 3       | 1     |       |
| Back pain                                                      | 2         |       |       | 1       | 1     |       |
| Neck pain                                                      |           |       |       | 1       |       |       |
| <b>Eye disorders</b>                                           |           |       |       |         |       |       |
| Dry eye                                                        | 1         |       |       |         |       |       |
| <b>Infections and infestations</b>                             |           |       |       |         |       |       |
| Upper respiratory infection                                    |           |       |       | 1       | 1     |       |
| Infections and infestations - Other - Genital herpes outbreak  |           | 1     |       |         |       |       |
| Infections and infestations - Other - Genital herpes out break |           | 1     |       |         |       |       |
| Rhinitis infective                                             |           | 1     |       |         |       |       |
| <b>Cardiac disorders</b>                                       |           |       |       |         |       |       |
| Palpitations                                                   | 1         |       |       | 1       |       |       |
| Atrial fibrillation                                            |           | 1     |       |         |       |       |
| <b>Nervous system disorders</b>                                |           |       |       |         |       |       |
| Headache                                                       |           |       |       | 3       | 2     |       |
| Peripheral sensory neuropathy                                  | 1         |       |       |         |       |       |
| Presyncope                                                     |           |       |       |         | 1     |       |
| Neuralgia                                                      |           |       |       | 1       |       |       |
| Nervous system disorders - Other - buzzing over body           | 1         |       |       |         |       |       |

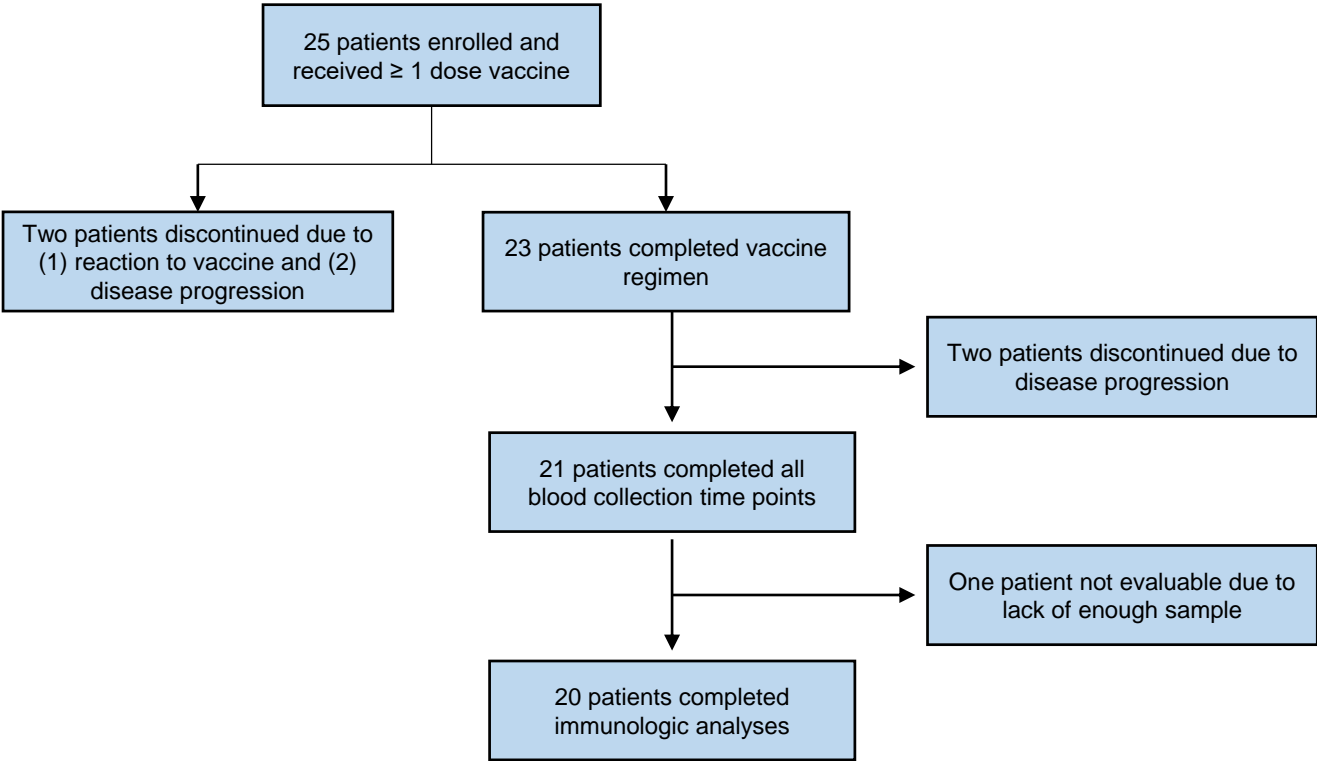

**Supplemental Figure 1.** Flow diagram of patients progression through the trial
